# Supplementary material for: Association of simple renal cysts and chronic kidney disease with large abdominal aortic aneurysm
Source: Springer Nature journal article supplement (doi:10.1186/s12882-020-01841-6), 2020-05-29
Supplement: MOESM2 [file 18032062]

**SUPPLEMENTARY MATERIAL**

**Miszczuk et al. Association of simple renal cysts and chronic kidney disease with large abdominal aortic aneurysm**

**Supplemental Table I: Data dictionary, in alphabetical order**

| <b>Parameter</b>          | <b>Definition</b>                                                                                                                                                                                                                                                                                                                                                                                                                                                                          | <b>Obtained from</b> |
|---------------------------|--------------------------------------------------------------------------------------------------------------------------------------------------------------------------------------------------------------------------------------------------------------------------------------------------------------------------------------------------------------------------------------------------------------------------------------------------------------------------------------------|----------------------|
| AAA diameter              | At the time of initial diagnosis and surgery, in mm                                                                                                                                                                                                                                                                                                                                                                                                                                        | CT                   |
| Age                       | AAA group: Age at initial diagnosis or, if missing, surgery<br>Control group: Age at CT scan                                                                                                                                                                                                                                                                                                                                                                                               | Medical records      |
| Artificial pacemaker      | ICD-10: Z95.0                                                                                                                                                                                                                                                                                                                                                                                                                                                                              | Medical records      |
| ASA score                 | <ul style="list-style-type: none"> <li>• ASA I – Normal, healthy patient</li> <li>• ASA II – Patient with mild systemic disease</li> <li>• ASA III – Patient with severe systemic disease</li> <li>• ASA IV – Patient with severe systemic disease that is a constant threat to life</li> <li>• ASA V – Moribund patient who is not expected to survive without the operation</li> <li>• ASA VI – Declared brain-dead patient whose organs are being removed for donor purposes</li> </ul> | Medical records      |
| Atrial fibrillation       | ICD-10: I48.9                                                                                                                                                                                                                                                                                                                                                                                                                                                                              | Medical records      |
| Blood group               | A/B/AB/0                                                                                                                                                                                                                                                                                                                                                                                                                                                                                   | Medical records      |
| BMI                       | In kg/cm <sup>2</sup>                                                                                                                                                                                                                                                                                                                                                                                                                                                                      | Medical records      |
| Cholecystolithiasis       | <ul style="list-style-type: none"> <li>• Cholecystolithiasis ICD-10: K80.2</li> <li>• Cholecystectomy ICD-10: Z90.4</li> </ul>                                                                                                                                                                                                                                                                                                                                                             | CT                   |
| Chronic kidney disease    | Chronic kidney disease: <ul style="list-style-type: none"> <li>• Stage 1 ICD-10: N18.1</li> <li>• Stage 2 ICD-10: N18.2</li> <li>• Stage 3 ICD-10: N18.3</li> <li>• Stage 4 ICD-10: N18.4</li> <li>• Stage 5 ICD-10: N18.5</li> </ul>                                                                                                                                                                                                                                                      | Medical records      |
| Congestive heart failure  | ICD-10: I50.0<br>NYHA class I/II/III/IV                                                                                                                                                                                                                                                                                                                                                                                                                                                    | Medical records      |
| Connective tissue disease | <ul style="list-style-type: none"> <li>• Marfan syndrome ICD-10: Q87.4</li> <li>• Ehlers-Danlos syndrome ICD-10: Q79.6</li> <li>• Loeys-Dietz syndrome ICD-10: Q25.4</li> </ul>                                                                                                                                                                                                                                                                                                            | Medical records      |
| COPD                      | ICD-10: J44.90-93                                                                                                                                                                                                                                                                                                                                                                                                                                                                          | Medical records      |

|                           |                                                                                                                                                                                                                          |                 |
|---------------------------|--------------------------------------------------------------------------------------------------------------------------------------------------------------------------------------------------------------------------|-----------------|
| Coronary artery disease   | ICD-10: I25.1                                                                                                                                                                                                            | Medical records |
| Coronary bypass           | ICD-10: Z95.1                                                                                                                                                                                                            | Medical records |
| Diabetes                  | ICD-10: E11.90<br>Treatment with: <ul style="list-style-type: none"> <li>• Diet</li> <li>• Medication</li> <li>• Insulin</li> </ul>                                                                                      | Medical records |
| Diverticulosis            | <ul style="list-style-type: none"> <li>• Diverticulosis ICD-10: K57.0</li> <li>• Diverticulitis ICD-10: K57.12</li> <li>• Sigma resection ICD-10: Z90.4</li> </ul>                                                       | CT              |
| Ejection fraction         | In %                                                                                                                                                                                                                     | Medical records |
| Family history of AAA     | Does patient have any first or second degree relatives with AAA                                                                                                                                                          | Medical records |
| Height                    | In centimeters                                                                                                                                                                                                           | Medical records |
| Hernia                    | Present or status post-surgery <ul style="list-style-type: none"> <li>• Inguinal hernia ICD-10: K40.0</li> <li>• Umbilical hernia ICD-10: K42.0</li> </ul>                                                               | CT              |
| Hyperlipidemia            | ICD-10: E78.9                                                                                                                                                                                                            | Medical records |
| Hiatal hernia             | ICD-10: K44.9                                                                                                                                                                                                            | CT              |
| Hypertension              | ICD-10: I10.00 or medication                                                                                                                                                                                             | Medical records |
| Hypothyroidism            | ICD-10: E03.9                                                                                                                                                                                                            | Medical records |
| Liver cysts               | ICD-10: K76.8<br>Size <ul style="list-style-type: none"> <li>• <math>\leq 1</math> cm</li> <li>• <math>&gt; 1 - \leq 3</math> cm</li> <li>• <math>&gt; 3 - \leq 5</math> cm</li> <li>• <math>&gt; 5</math> cm</li> </ul> | CT              |
| Lung function (FEV1/VC)   | In %                                                                                                                                                                                                                     | Medical records |
| Myocardial infarction     | ICD-10: I25.2                                                                                                                                                                                                            | Medical records |
| Nephrolithiasis           | ICD-10: N20.0                                                                                                                                                                                                            | CT              |
| Other aneurysm            | Presence of aneurysms in other arteries                                                                                                                                                                                  | CT              |
| Pancreatic cysts          | ICD-10: K86.2                                                                                                                                                                                                            | CT              |
| Peripheral artery disease | ICD-10: I70.29 <ul style="list-style-type: none"> <li>• Fontaine Stage I/IIa/IIb/III/IV</li> <li>• Bypass ICD-10: Z95.88</li> <li>• PTA ICD-10: Z95.88</li> </ul>                                                        | Medical records |
| PTCA                      | ICD-10: Z95.88                                                                                                                                                                                                           | Medical records |
| Renal cysts               | ICD-10: N28.1<br>Size <ul style="list-style-type: none"> <li>• <math>\leq 1</math> cm</li> <li>• <math>&gt; 1 - \leq 3</math> cm</li> <li>• <math>&gt; 3 - \leq 5</math> cm</li> </ul>                                   | CT              |

|                        |                                                                                                                                                                                        |                 |
|------------------------|----------------------------------------------------------------------------------------------------------------------------------------------------------------------------------------|-----------------|
|                        | <ul style="list-style-type: none"> <li>• &gt; 5 cm</li> </ul>                                                                                                                          |                 |
| Rhesus factor          | Rh +/Rh -                                                                                                                                                                              | Medical records |
| Smoking                | <ul style="list-style-type: none"> <li>• Current or former smoking ICD-10: F17.2</li> <li>• Years and amount of smoking (pack years)</li> <li>• Years since stopped smoking</li> </ul> | Medical records |
| Splenic cysts          | ICD-10: D73.4                                                                                                                                                                          | CT              |
| Stroke                 | <ul style="list-style-type: none"> <li>• TIA ICD-10: G45.99</li> <li>• Stroke ICD-10: I64</li> </ul>                                                                                   | Medical records |
| Surgical material used | Graft material used in AAA surgery                                                                                                                                                     | Medical records |
| Urgency of AAA surgery | Elective, urgent, emergent                                                                                                                                                             | Medical records |
| Weight                 | In kilograms                                                                                                                                                                           | Medical records |

AAA, abdominal aortic aneurysm; ASA score, American Society of Anesthesiologists; BMI, body mass index; COPD, chronic obstructive pulmonary disease; CT, computer tomography; FEV1/VC, Tiffeneau-Pinelli index, lung function; ICD-10, International Classification of Diseases; NYHA, New York Heart Association; PTA, percutaneous transluminal angioplasty; PTCA, percutaneous transluminal coronary angioplasty; TIA, transient ischemic attack.

**Supplemental Table II:** Comparison of height, weight, and BMI between the AAA and control group

| Variable               | AAA<br>(n = 96) |        | Control<br>(n = 98) |        | P value <sup>a</sup> |
|------------------------|-----------------|--------|---------------------|--------|----------------------|
|                        | Mean+/-SD       | Median | Mean+/-SD           | Median |                      |
| Height, cm             | 173.29 ± 8.78   | 174    | 174.01 ± 8.05       | 175    | 0.569                |
| Weight, kg             | 80.37 ± 15.82   | 80     | 79.48 ± 13.99       | 76.50  | 0.383                |
| BMI, kg/m <sup>2</sup> | 26.72 ± 4.7     | 26.56  | 26.18 ± 3.66        | 25.59  | 0.307                |

<sup>a</sup> Mann-Whitney U test

Data were not available on 1 AAA patient and 2 controls.

**Supplemental Table III: ASA-Scores**

| <b>Study group</b> | <b>ASA I</b> | <b>ASA II</b> | <b>ASA III</b> | <b>ASA IV</b> | <b>ASA V</b> | <b>Data available on (n)</b> | <b>Average ASA-Score</b> |
|--------------------|--------------|---------------|----------------|---------------|--------------|------------------------------|--------------------------|
| AAA group          | 1            | 21            | 70             | 3             | 2            | 97                           | 2.84 ± 0.589             |
| Control group      | 3            | 34            | 61             | 1             | 1            | 100                          | 2.63 ± 0.614             |

**Supplemental Table IV: AB0-blood groups**

| <b>Study group</b> | <b>A</b> | <b>B</b> | <b>AB</b> | <b>0</b> | <b>Data available on (n)</b> | <b>P value Chi-square-test</b> |
|--------------------|----------|----------|-----------|----------|------------------------------|--------------------------------|
| AAA group          | 40       | 15       | 6         | 34       | 95                           | 0.922                          |
| Control group      | 31       | 12       | 3         | 23       | 69                           |                                |

**Supplemental Table V: Rhesus factor**

| <b>Study group</b> | <b>Positive, n</b> | <b>Negative, n</b> | <b>Data available on (n)</b> | <b>P value Chi-square-test</b> |
|--------------------|--------------------|--------------------|------------------------------|--------------------------------|
| AAA group          | 80                 | 15                 | 95                           | 0.833                          |
| Control group      | 57                 | 12                 | 69                           |                                |
